# Supplementary material for: Genetic Distinctiveness of the Herdwick Sheep Breed and Two Other Locally Adapted Hill Breeds of the UK
Source: PLoS One. 2014 Jan 29;9(1):e87823. doi: 10.1371/journal.pone.0087823 (PMC3906253; doi:10.1371/journal.pone.0087823)
Supplement: Table S1 — Data set of enJSRV insertions per individual of each breed. (XLSX) [file pone.0087823.s002.xlsx]

## Sheet: Sheet1
Table S1. Data set of enJSRV insertions per individual of each breed.
	The four common retroviral insertions					The rare retroviral insertions
Animal	enJSRV-18	enJSRV-7	enJS5F16	enJSRV-8		enJSRV-15	enJSRV16
Dalesbred_1	1	0	1	0		0	0
Dalesbred_2	1	1	1	0		0	0
Dalesbred_3	1	1	1	0		1	0
Dalesbred_4	1	0	1	0		0	0
Dalesbred_5	1	1	1	0		0	0
Dalesbred_6	0	1	0	0		0	0
Dalesbred_7	1	1	1	0		0	0
Dalesbred_8	nd	1	nd	0		nd	nd
Dalesbred_9	nd	nd	nd	nd		nd	0
Dalesbred_10	1	1	1	0		0	0
Dalesbred_11	1	0	1	0		0	0
Dalesbred_12	1	0	1	0		0	0
Dalesbred_13	1	0	1	0		0	0
Dalesbred_14	1	1	1	0		0	0
Dalesbred_15	1	0	1	0		1	0
Dalesbred_16	1	0	1	0		0	0
Dalesbred_17	1	1	1	0		0	0
Dalesbred_18	1	0	1	0		1	0
Dalesbred_19	1	1	1	0		0	0
Herdwick_1	1	1	0	0		1	0
Herdwick_2	1	0	1	0		0	1
Herdwick_3	0	0	0	0		0	0
Herdwick_4	1	0	0	0		0	0
Herdwick_5	0	0	0	0		1	0
Herdwick_6	0	0	0	0		0	0
Herdwick_7	1	0	0	0		0	0
Herdwick_8	0	0	1	0		1	0
Herdwick_9	1	0	1	0		0	0
Herdwick_10	1	0	1	0		1	1
Herdwick_11	1	0	0	0		0	1
Herdwick_12	0	0	0	0		0	0
Herdwick_13	1	0	0	0		0	0
Herdwick_14	1	1	0	0		0	0
Herdwick_15	0	0	0	0		1	0
Herdwick_16	0	0	0	0		0	1
Herdwick_17	0	0	0	0		0	0
Herdwick_18	1	0	1	0		1	0
Herdwick_19	1	0	0	0		1	0
Rough_Fell_1	1	1	0	0		1	0
Rough_Fell_2	1	0	1	0		1	0
Rough_Fell_3	1	1	1	0		1	1
Rough_Fell_4	1	0	1	0		0	0
Rough_Fell_5	1	1	1	0		0	0
Rough_Fell_6	1	1	1	0		0	0
Rough_Fell_7	1	0	1	0		0	0
Rough_Fell_8	1	0	1	0		0	0
Rough_Fell_9	1	1	0	0		0	0
Rough_Fell_10	1	1	1	0		0	0
Rough_Fell_11	nd	0	0	0		0	0
Rough_Fell_12	1	0	1	0		0	0
Rough_Fell_13	1	0	0	0		1	0
Rough_Fell_14	1	0	1	0		0	0
Rough_Fell_15	1	1	1	0		0	0
Rough_Fell_16	1	0	0	0		0	1
Rough_Fell_17	1	0	1	0		1	0
Rough_Fell_18	1	0	1	0		0	1
Rough_Fell_19	1	0	1	0		0	0
