# Supplementary material for: Genetic Distinctiveness of the Herdwick Sheep Breed and Two Other Locally Adapted Hill Breeds of the UK
Source: PLoS One. 2014 Jan 29;9(1):e87823. doi: 10.1371/journal.pone.0087823 (PMC3906253; doi:10.1371/journal.pone.0087823)
Supplement: Table S2 — Genotypes at 3 SNP loci. (XLSX) [file pone.0087823.s003.xlsx]

## Sheet: Sheet1
Table S2. Genotypes at 3 SNP loci.
SNP	TMEM154E35K	OAR10_29511510	OAR16_4194318
Associated gene	TMEM154	RXFP2	PRLR
Associated phenotype	viral susceptibility	horn traits	reproductive performance
Dalesbred_1	A	T	A
Dalesbred_2	h	-	-
Dalesbred_3	h	h	-
Dalesbred_4	A	T	A
Dalesbred_5	A	h	A
Dalesbred_6	A	T	A
Dalesbred_7	A	h	A
Dalesbred_8	A	T	A
Dalesbred_9	A	h	-
Dalesbred_10	G	T	A
Dalesbred_11	h	T	A
Dalesbred_12	A	h	-
Dalesbred_13	G	h	A
Dalesbred_14	A	T	h
Dalesbred_15	A	h	A
Dalesbred_16	A	T	A
Dalesbred_17	G	T	A
Dalesbred_18	G	T	C
Dalesbred_19	h	T	A
Herdwick_1	A	C	C
Herdwick_2	h	C	A
Herdwick_3	G	C	A
Herdwick_4	h	C	A
Herdwick_5	A	C	C
Herdwick_6	h	C	h
Herdwick_7	h	C	h
Herdwick_8	h	C	h
Herdwick_9	A	C	A
Herdwick_10	h	C	A
Herdwick_11	A	C	h
Herdwick_12	h	C	h
Herdwick_13	G	C	h
Herdwick_14	G	C	h
Herdwick_15	A	C	C
Herdwick_16	G	C	h
Herdwick_17	h	C	C
Herdwick_18	A	C	h
Herdwick_19	A	C	A
Rough_Fell_1	G	T	A
Rough_Fell_2	h	T	A
Rough_Fell_3	G	T	A
Rough_Fell_4	h	T	A
Rough_Fell_5	A	T	A
Rough_Fell_6	A	T	A
Rough_Fell_7	h	T	A
Rough_Fell_8	A	T	A
Rough_Fell_9	h	T	A
Rough_Fell_10	A	T	A
Rough_Fell_11	A	T	h
Rough_Fell_12	h	T	A
Rough_Fell_13	A	T	A
Rough_Fell_14	A	T	A
Rough_Fell_15	A	T	A
Rough_Fell_16	h	T	A
Rough_Fell_17	A	T	A
Rough_Fell_18	A	T	A
Rough_Fell_19	A	T	-
The table shows the SNP genotypes at three SNP loci for 19 animals of each breed.
The data were generated using the KASPar system as described
h = heterozygote.
- = not determined
