# Supplementary material for: Genetic Distinctiveness of the Herdwick Sheep Breed and Two Other Locally Adapted Hill Breeds of the UK
Source: PLoS One. 2014 Jan 29;9(1):e87823. doi: 10.1371/journal.pone.0087823 (PMC3906253; doi:10.1371/journal.pone.0087823)
Supplement: Table S3 — Genotyping of sheep using microsatellites. (XLSX) [file pone.0087823.s004.xlsx]

## Sheet: Sheet1
Table S3. Genotyping of sheep using microsatellites.
Animal	BM8125	MAF214	MAF65	OarHH47	OarAE129	OarFCB128	OarFCB304	McM527	OarVH72	OarCP34
Dalesbred_1	111	181/215	125/135	130/142	146	103	169	164/166	123	109/111
Dalesbred_2	111	196/215	125/139	136	146	105	162/169	164	123/133	107/109
Dalesbred_3	109/111	181/183	125	144	146	105	169/175	164	133	107/111
Dalesbred_4	111	181/215	125/127	128/134	146	103/105	162/169	164/170	123/133	109/117
Dalesbred_5	113	181/213	125/127	136	133	103/115	162	164	123/133	109
Dalesbred_6	111	181	125	136	146	105/113	169/175	164/166	131/133	111
Dalesbred_7	111	181	125	136	146	103	162/169	164	121/131	107/113
Dalesbred_8	111	213	125/127	136	146	103	162/169	164	121/131	109/117
Dalesbred_9	111	213	125	136	146	103	169	166	131/133	109
Dalesbred_10	111	213	125	134/144	146	103/105	162/169	164/166	133	109
Dalesbred_11	111	181/196	125	136/142	146	103/115	162/169	164	121	107/111
Dalesbred_12	111	215	125	136/138	146/165	103/115	169/185	164/166	125/135	111
Dalesbred_13	111/113	181/215	125/127	136/142	146	103	162/169	164	131/135	111
Dalesbred_14	111/113	181/213	125/127	136	133/146	103/105	162	164	121/123	117
Dalesbred_15	103/111	181	127/129	142	144/146	105/109	162/169	164	127/131	111
Dalesbred_16	111/113	181/215	125/129	121/136	146	103	162/169	164	135	107/113
Dalesbred_17	111/115	181/213	125/129	134/138	144/146	103	162	164	123/133	109
Dalesbred_18	109/111	181	125	136/142	133/144	103/105	162/169	164/170	133	113/117
Dalesbred_19	111/117	181/213	131/139	130/138	146	115	162/175	164	133	113/115
Herdwick_1	107/111	181/183	127/135	128/134	146	115/117	162	166/176	121/131	111/115
Herdwick_2	107/111	181/183	125/135	134	144/146	113/117	162	166	123/127	107/111
Herdwick_3	111	181	125/127	134/144	144	113/115	160/177	164/168	123/133	107/111
Herdwick_4	111/113	181/183	125/135	130/134	144/146	115	162/164	166/176	123	107
Herdwick_5	111/115	181/183	135	128/130	144/146	117	160/177	166/168	123/133	107/111
Herdwick_6	111/115	181/183	129/135	125/130	144/146	105/115	164/169	166	123/127	107/117
Herdwick_7	107/113	181/183	125	134/140	144/163	105	160/162	166	121	107
Herdwick_8	113	181	125/135	134/144	144	105/115	162	164/176	121/131	107
Herdwick_9	111/113	181	127/135	134/144	146	103	162/169	166/168	127	107/111
Herdwick_10	111/113	181/183	127/135	134	146/163	113	164/169	166	121/133	107/115
Herdwick_11	107/111	181/183	125/135	134/144	146	115	160/164	174/176	121/123	107
Herdwick_12	111/113	181	129	121/128	133/146	115	162/164	164/168	133	107
Herdwick_13	107/111	181	125/127	134	144	105/117	160/162	164	121/127	115/117
Herdwick_14	111	183	125/127	128/140	133/146	113/115	160/169	166/176	121/127	107
Herdwick_15	107/111	183	125/135	121/144	144/163	117	162/169	164/166	121	107/115
Herdwick_16	107/113	181/183	135	134/144	148	103	162/169	164	127/133	107/111
Herdwick_17	107/113	181	127/135	144	144/146	103/117	160/162	166/170	127	109/115
Herdwick_18	111/113	181/183	125/135	134	133	91/113	162	166	121/133	107
Herdwick_19	107/115	181	125/131	134	146	115	162/164	168/176	121/127	107/111
Rough_Fell_1	115	181	127/129	142	144	115	162	166/168	131	109
Rough_Fell_2	111/115	181	127	121/132	133/146	105/115	162/179	164/170	121/123	109
Rough_Fell_3	111	181/242	123/129	121/134	133/144	115	162	170/176	121	109
Rough_Fell_4	111	181	125/129	121/132	133	105/115	160/162	170	123/131	109/111
Rough_Fell_5	111	181	127/129	132	133/146	105/117	162	164	123/127	109/115
Rough_Fell_6	111	181/246	125/127	121/136	133/144	115	162/171	164	121/123	107/109
Rough_Fell_7	111/113	181/242	127/129	121/128	144	115	160/162	166/168	121/129	107/109
Rough_Fell_8	111	181/242	123/129	128/134	144/146	105/115	162/177	166/172	123	109
Rough_Fell_9	111	181/242	129/135	121/128	133/144	105	169/177	164/176	123	109
Rough_Fell_10	111	181/242	125/129	121	133/144	105/115	162	164/170	123/127	109
Rough_Fell_11	113	181	125/127	121/142	144	105/115	169/177	170	127	109
Rough_Fell_12	111	181	123/129	136	144	105/115	162	170/176	123	107/115
Rough_Fell_13	113	181	129	134/136	133	91/115	162	170	123	109/117
Rough_Fell_14	111/115	181	127/129	121/128	144/146	105/115	162/177	164/172	123/129	109/111
Rough_Fell_15	111	181/246	125/129	121/132	146	105/117	162/185	170/172	127	109/111
Rough_Fell_16	111	181/242	123/129	121/132	146	105	162/185	164/172	121/123	109
Rough_Fell_17	111	181/246	129	121	144	105/115	162	164/168	129/131	109
Rough_Fell_18	115	181	127	132	146	105	162	170	129	107
Rough_Fell_19	115	181	129	121/128	133/146	105	162/177	170	123	109
The table shows the genotypes at 10 microsatellite loci for 19 animals from each of three breeds.
Where a single integer is shown, the animal is a homozygote, heterozygotes are shown as two integers separated by a slash('/').
The data were generated as decribed in Supplementary information.
